# Supplementary material
Source: PubMed Central journal article supplement (PMC3959274)

## SUPPLEMENTAL ONLINE MATERIAL

**Fig 2.** Results of latent variable growth curve model predicting alcohol use disorder (AUD) risk.

*Note.* Fig 2 depicts the final model after the deletion of all non-significant paths. Paths involving error terms have been omitted for the sake of simplicity. Hypothesized paths from religiosity were also tested but were found to be nonsignificant in all cases; therefore this variable has been omitted from the final model. All other demographic and background variables (e.g., race, sex, mother and father education, neighborhood income, family history of alcohol problems, parental monitoring during high school, impulsive sensation-seeking, childhood conduct problems, age at first drink, high school drinking frequency, high school illicit drug use) have been omitted for ease of presentation.

<sup>a</sup>The reference group for the living situation variables is campus housing. Living situation=Family/other was also held constant, but is not shown in the figure because it did not achieve statistical significance in the model.

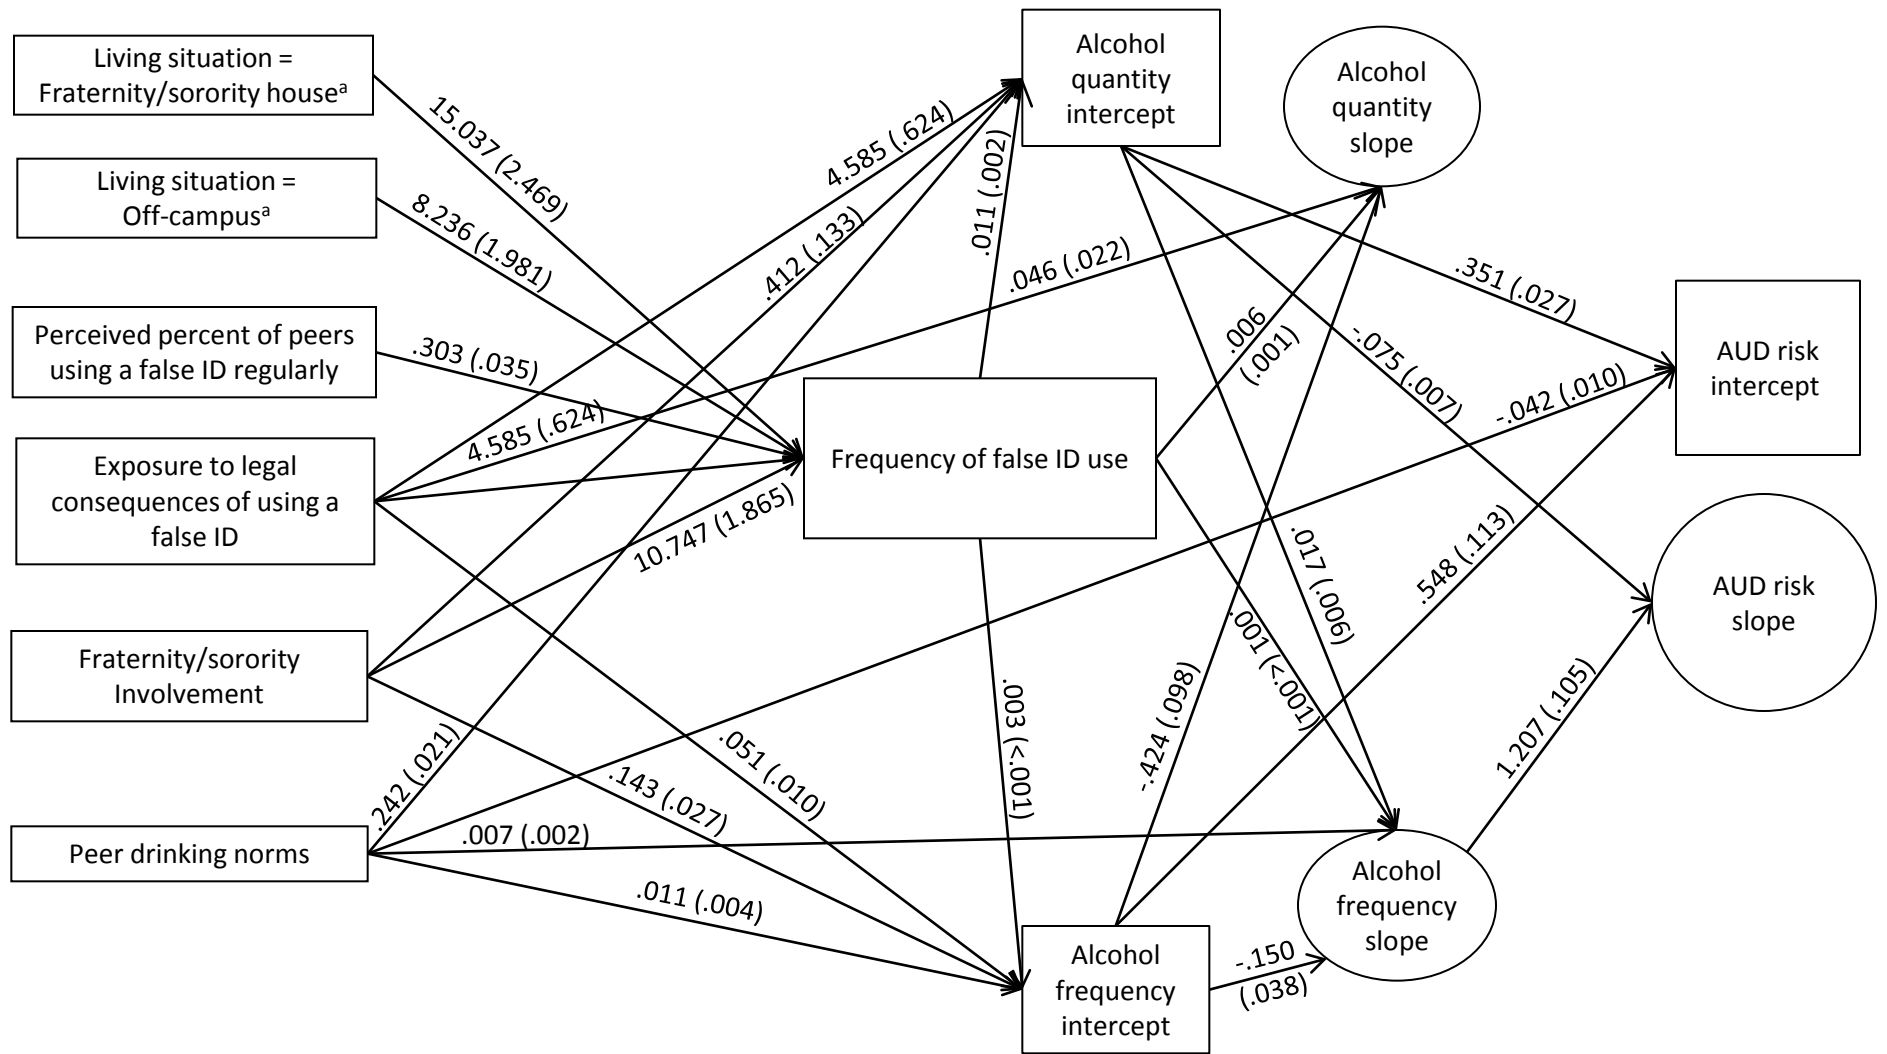

Supplement: NIHMS519469-supplement-Supp_Materials.pdf [file NIHMS519469-supplement-Supp_Materials.pdf]
